# Supplementary material
Source: Springer Nature journal article supplement (https://www.springermedizin.de/resource/supplementary/13000_2012_662_MOESM3_ESM.pdf/9624782)

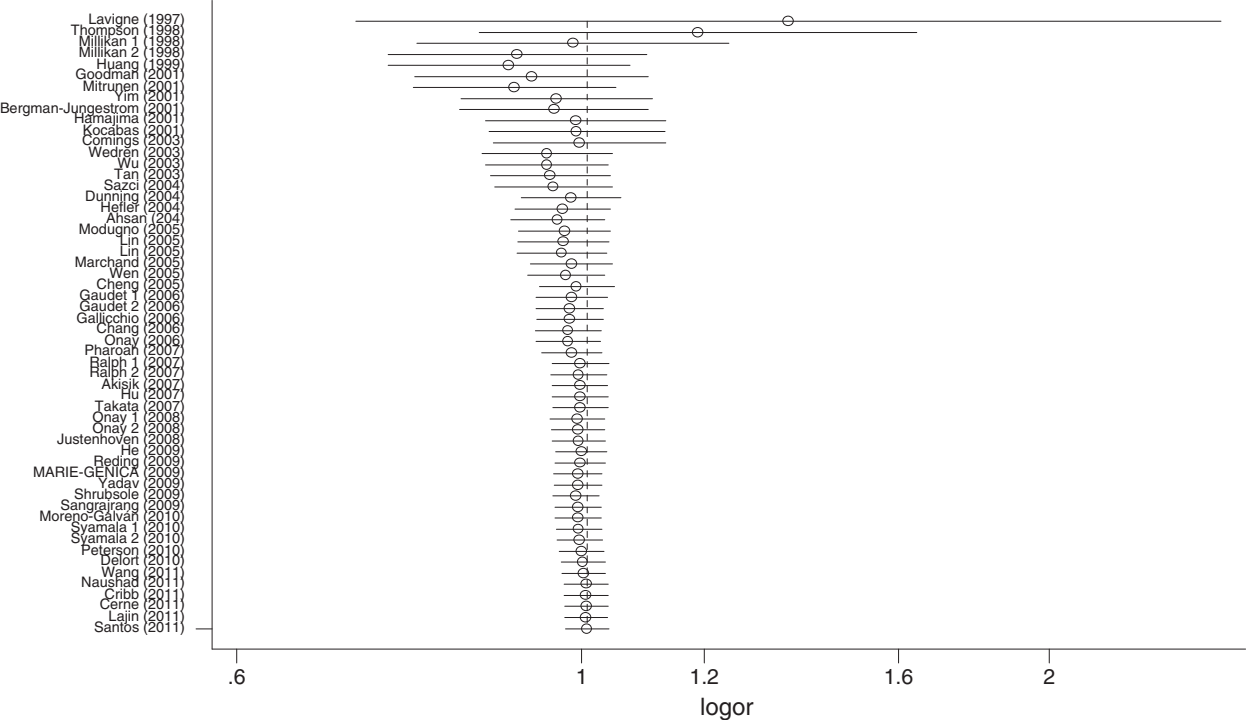

Supplement: MOESM3 [file 9624782]
